# Supplementary material for: The Association between Difficulties with Speech Fluency and Language Skills in a National Age Cohort of Children with Down Syndrome
Source: MDPI journal article supplement (doi:10.3390/brainsci11060704), 2021-05-26
Supplement: s1 [file s1]

**Table S1.** Correlation matrix (N = 41)

|                                  | 2.   | 3.          | 4.          | 5.          | 6.         | 7.   | 8.         | 9.         | 10.        |
|----------------------------------|------|-------------|-------------|-------------|------------|------|------------|------------|------------|
| 1. Difficulties with fluency     | -.20 | <b>-.52</b> | <b>-.32</b> | <b>-.40</b> | -.30       | -.03 | .07        | -.21       | -.06       |
| 2. Nonverbal mental functioning  |      | <b>.57</b>  | <b>.60</b>  | <b>.41</b>  | <b>.41</b> | .05  | .16        | -.02       | <b>.35</b> |
| 3. Vocabulary, mean              |      |             | <b>.70</b>  | <b>.72</b>  | <b>.59</b> | .00  | -.06       | -.02       | <b>.44</b> |
| 4. Grammar, mean                 |      |             |             | <b>.61</b>  | <b>.36</b> | -.12 | .00        | -.14       | <b>.46</b> |
| 5. Phonology, mean               |      |             |             |             | <b>.60</b> | -.04 | -.06       | .00        | .28        |
| 6. Processing speed, mean        |      |             |             |             |            | .01  | -.03       | .21        | .00        |
| 7. Vocabulary, difference        |      |             |             |             |            |      | <b>.39</b> | <b>.42</b> | .06        |
| 8. Grammar, difference           |      |             |             |             |            |      |            | <b>.34</b> | .09        |
| 9. Phonology, difference         |      |             |             |             |            |      |            |            | -.19       |
| 10. Processing speed, difference |      |             |             |             |            |      |            |            |            |

Note. Pearson correlation coefficients with significant ( $p \leq .05$ ) correlations in bold (and cursive when  $p \leq .001$ ). Nonverbal mental functioning was assessed with the *Block Design* subtest. Mean and difference represent combination and difference between receptive and expressive functioning within each subdomain. Receptive and expressive functioning were assessed with *British Picture Vocabulary* and *Picture Naming* for vocabulary, the *Test for Reception of Grammar* and the *Grammatical Closure* subtest from the *ITPA* for grammar, the mean of four *Phonological awareness tests* and the *Children's Test of Non-Word Repetition* for phonological skills, and the *Child Language and Learning's speed of processing tests* and the *Rapid Automatized Naming task* for processing speed. Data are based on 50 multiple imputed datasets for 0.7% missing data.
